# Supplementary material for: Infarct growth precedes cerebral thrombosis following experimental stroke in mice
Source: PubMed Central journal article supplement (PMC8613266; doi:10.1038/s41598-021-02360-6), 2021-11-24
Supplement: 41598_2021_2360_MOESM1_ESM.pdf [file 41598_2021_2360_MOESM1_ESM.pdf]

1 **Infarct growth precedes cerebral thrombosis following experimental**  
2 **stroke in mice**

3 Vanessa Göb<sup>1,2</sup>, Maximilian G. Voll<sup>1</sup>, Lena Zimmermann<sup>3</sup>, Katherina Hemmen<sup>2</sup>, Guido  
4 Stoll<sup>3</sup>, Bernhard Nieswandt<sup>1,2</sup>, Michael K. Schuhmann<sup>3</sup>, Katrin G. Heinze<sup>2\*</sup> and David  
5 Stegner<sup>1,2\*</sup>

6

7 Running head: Cerebral thrombus formation in ischemic stroke

8

9 <sup>1</sup>Institute of Experimental Biomedicine I, University Hospital Würzburg, Würzburg,  
10 Germany

11 <sup>2</sup>Rudolf Virchow Center for Integrative and Translational Bioimaging, University of  
12 Würzburg, Würzburg, Germany

13 <sup>3</sup>Department of Neurology, University Hospital Würzburg, Würzburg, Germany

14

15 \*Address correspondence to:

16 David Stegner: [stegner@virchow.uni-wuerzburg.de](mailto:stegner@virchow.uni-wuerzburg.de)

17 or Katrin G. Heinze: [katrin.heinze@virchow.uni-wuerzburg.de](mailto:katrin.heinze@virchow.uni-wuerzburg.de)

18

19 Keywords: ischemic stroke, thrombosis, platelet, reperfusion injury

20

## 21 Supplemental Material

### 22 Supplemental Methods

#### 23 Analysis of brain LSFM images

24 Images acquired by LSFM were saved in TIFF format and the thrombi and vessel  
 25 channel were deconvolved using Huygens software (Scientific Volume Imaging (SVI),  
 26 Hilversum, The Netherlands; signal-to-noise ratio: 40, background subtraction with  
 27 nearest object within a 2  $\mu\text{m}$  radius and 60 iterations). For object segmentation, firstly  
 28 machine learning based pixel classification for thrombi was performed using the Ilastik  
 29 [3] software. Next, binary images were exported based on the generated probabilities  
 30 using the build-in simple segmentation option of Ilastik. These images of segmented  
 31 thrombi were further processed using "Surface module" of the 3D rendering software  
 32 Bitplane Imaris (Bitplane AG, Zürich, Switzerland) to detect platelet aggregates with a  
 33 volume above 100  $\mu\text{m}^3$  and the total number of individual aggregates per brain was  
 34 exported.

35

### 36 Supplemental Figures

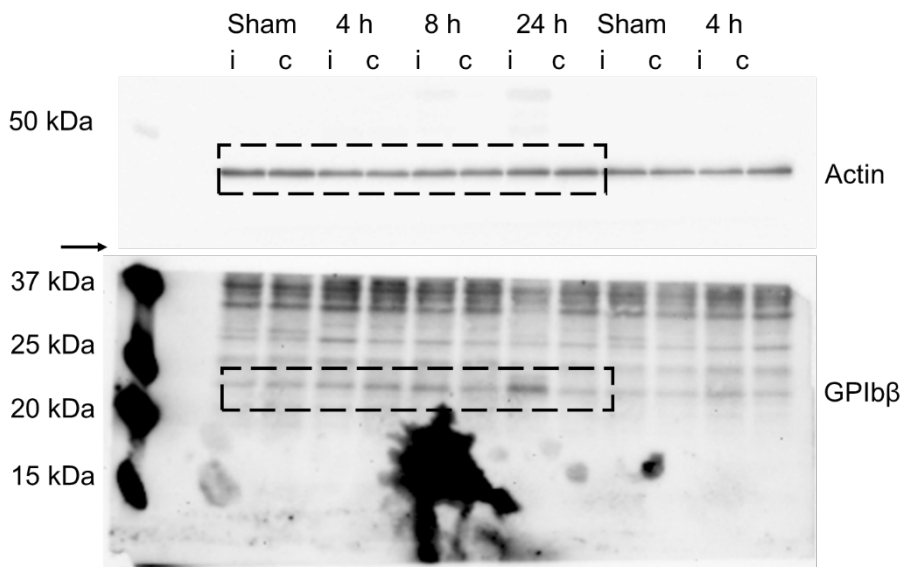

37

38 **Supplemental Figure 1. Quantification of platelet GPIIb/IIIa protein in brain lysates**  
 39 **of the cortex.** Uncropped membrane of Western Blot shown in Figure 2D. Regions  
 40 shown in Figure 2D are indicated by the black boxes. I: Ipsilateral; c: contralateral. The  
 41 membrane was cut above the 37 kDa marker band (black arrow) before incubation with  
 42 the different antibodies.

43

44

**45 Legends for supplemental video files**

46 **Videos: Cerebral thrombi are only detectable after 24 h of reperfusion.** Animations  
47 of 3D reconstructions of ipsilateral brain hemispheres of **(1)** sham operated mice or  
48 mice after tMCAO with 1 h occlusion and **(2)** 4 h of reperfusion, **(3)** 8 h of reperfusion  
49 or **(4)** 24 h of reperfusion. Vessels (CD105/CD31; red), platelets (GPIX, green). Grid  
50 size: 0.5 mm.

51

**52 Supplemental References**

53

- 54 1. Franke, M., et al., *The NLRP3 inflammasome drives inflammation in*  
55 *ischemia/reperfusion injury after transient middle cerebral artery occlusion in mice.*  
56 *Brain Behav Immun*, 2020.
- 57 2. Bergmeier, W., et al., *Structural and functional characterization of the mouse von*  
58 *Willebrand factor receptor GPIb-IX with novel monoclonal antibodies.* *Blood*, 2000.  
59 **95**(3): p. 886-93.
- 60 3. Berg, S., et al., *ilastik: interactive machine learning for (bio)image analysis.* *Nat*  
61 *Methods*, 2019. **16**(12): p. 1226-1232.

62
